# Supplementary material
Source: PubMed Central journal article supplement (PMC8062406)
Supplement: mmc1.pdf [file mmc1.pdf]

**Cell Reports, Volume 35**

**Supplemental information**

**Transcriptional and epi-transcriptional dynamics  
of SARS-CoV-2 during cellular infection**

**Jessie J.-Y. Chang, Daniel Rawlinson, Miranda E. Pitt, George Taiaroa, Josie Gleeson, Chenxi Zhou, Francesca L. Mordant, Ricardo De Paoli-Iseppi, Leon Caly, Damian F.J. Purcell, Timothy P. Stinear, Sarah L. Londrigan, Michael B. Clark, Deborah A. Williamson, Kanta Subbarao, and Lachlan J.M. Coin**

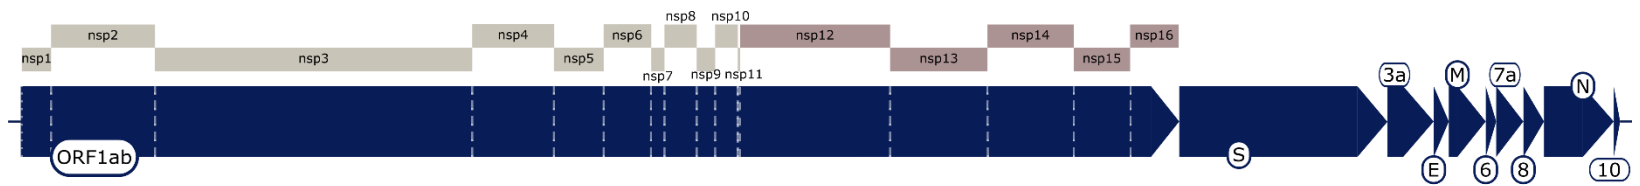

Single-Junction:

- leader,N
- leader,ORF7a
- leader,M
- ORF1ab,ORF10
- leader,ORF3a
- leader,ORF8
- leader,ORF6
- leader,S
- leader,E
- ORF1ab,N

Double-Junction:

- leader,M\_7a,10
- leader,N\_N,10
- leader,7a\_7a,10
- leader,ORF1ab\_ORF1ab,10
- leader\_ORF1ab,ORF1ab\_ORF1ab,10

**Figure S1. Schematic of major sgRNA described in this study, Related to Figures 1-5.** sgRNA are listed in order of abundance. Most of the central part of the genome is not expressed in sgRNA but is translated directly from genomic RNA.

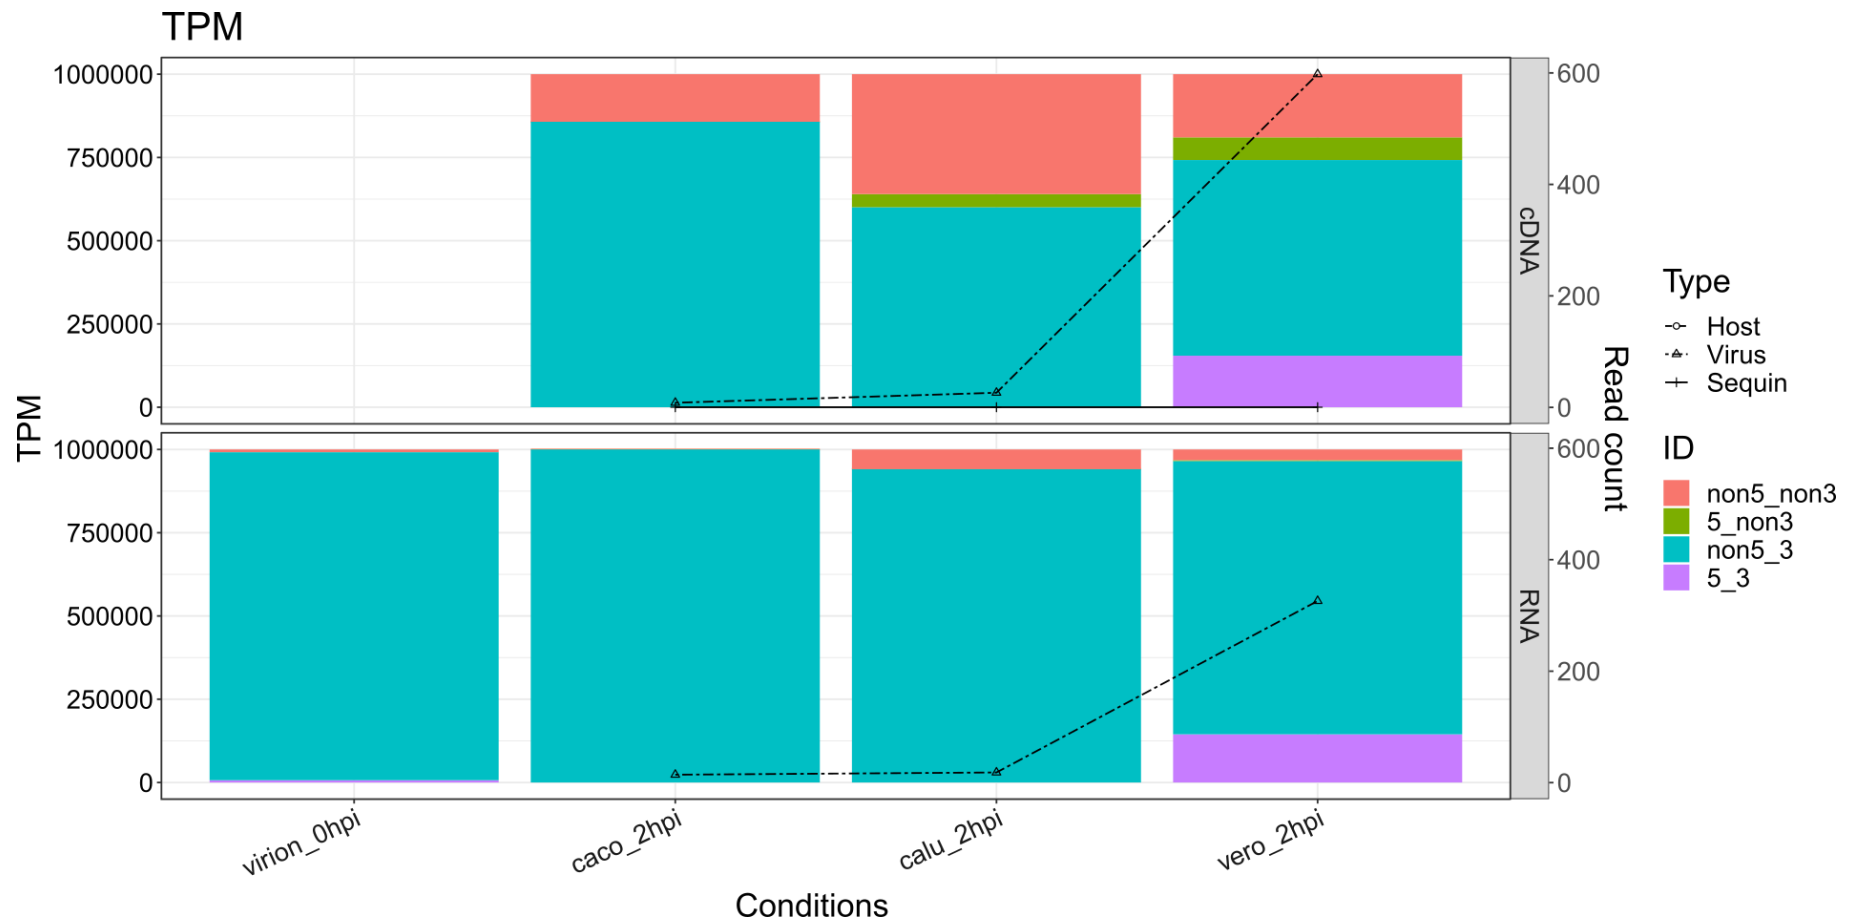

**Figure S2. TPM of mapped viral reads for different read categories for RNA from infected cells 2 hpi (left axis) and total number of viral mapping reads (right axis), Related to Figure 1. Top left cell is empty as virion cDNA was not sequenced.**

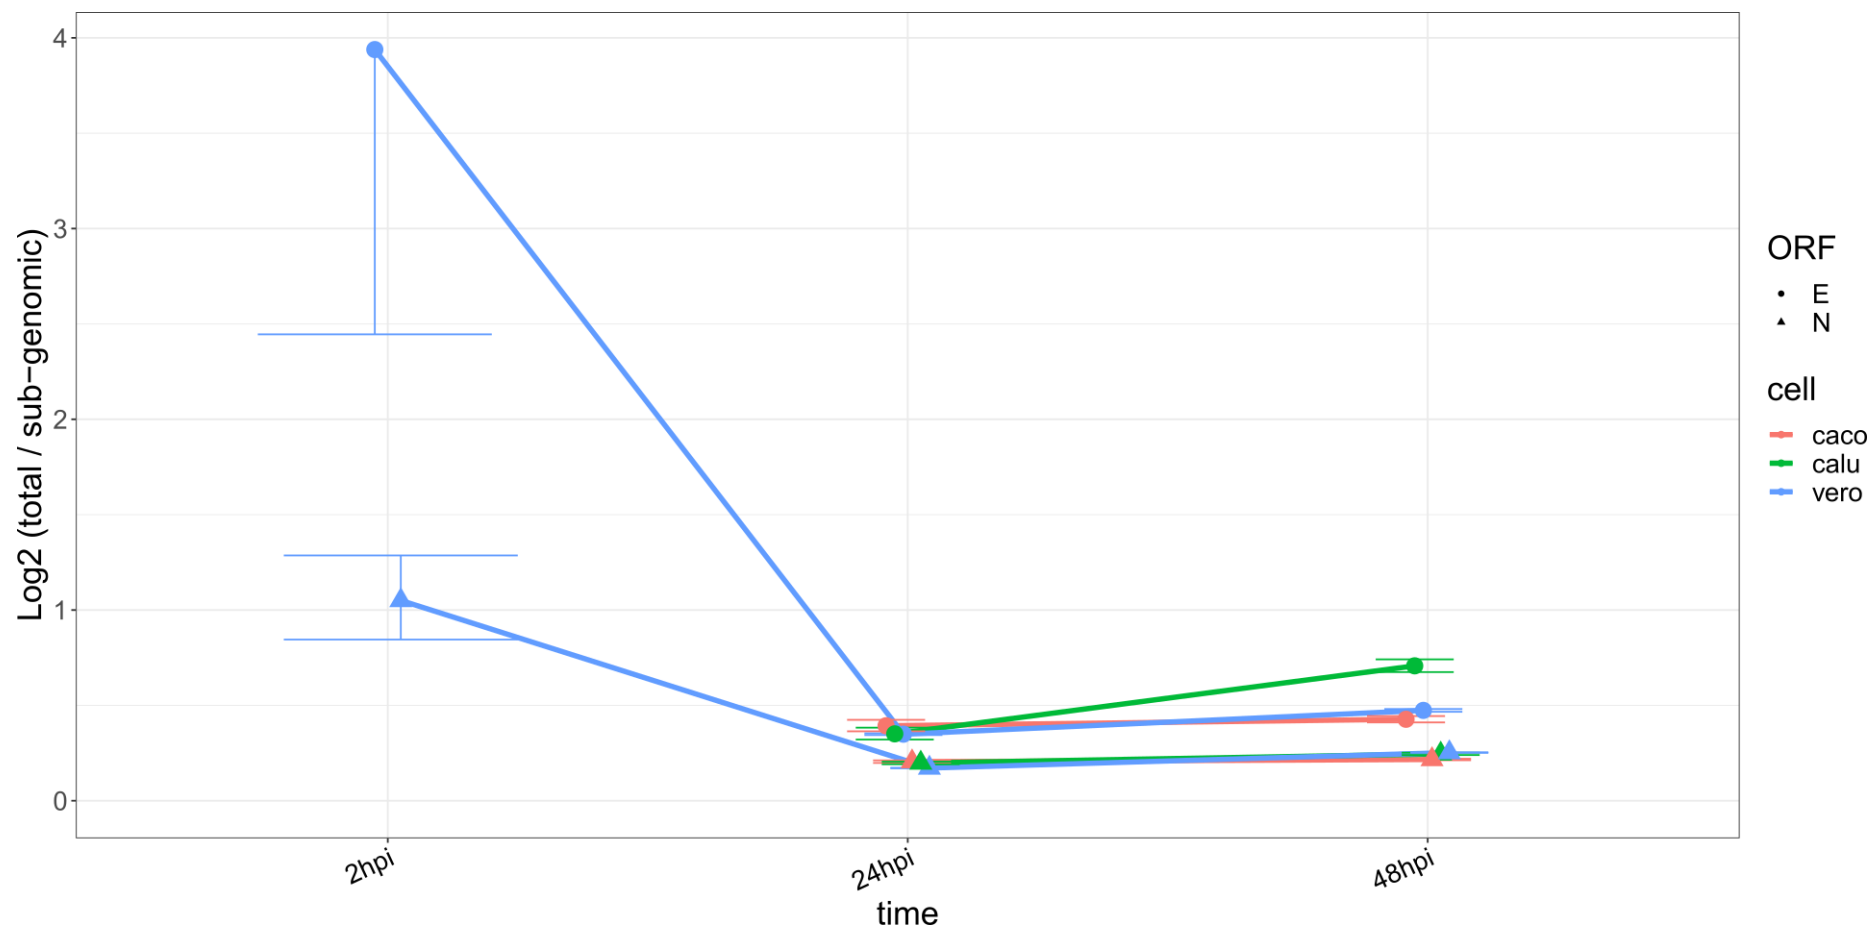

**Figure S3. Estimated Ct difference between sgRNA and total RNA from cDNA sequence data, Related to Figure 1.** Mean Ct differences are plotted with error bars indicating 95% CI estimated based on read depth (n=3, where n is the number of technical replicates). For virion E 2 hpi, only the lower 95% CI is shown.

**A**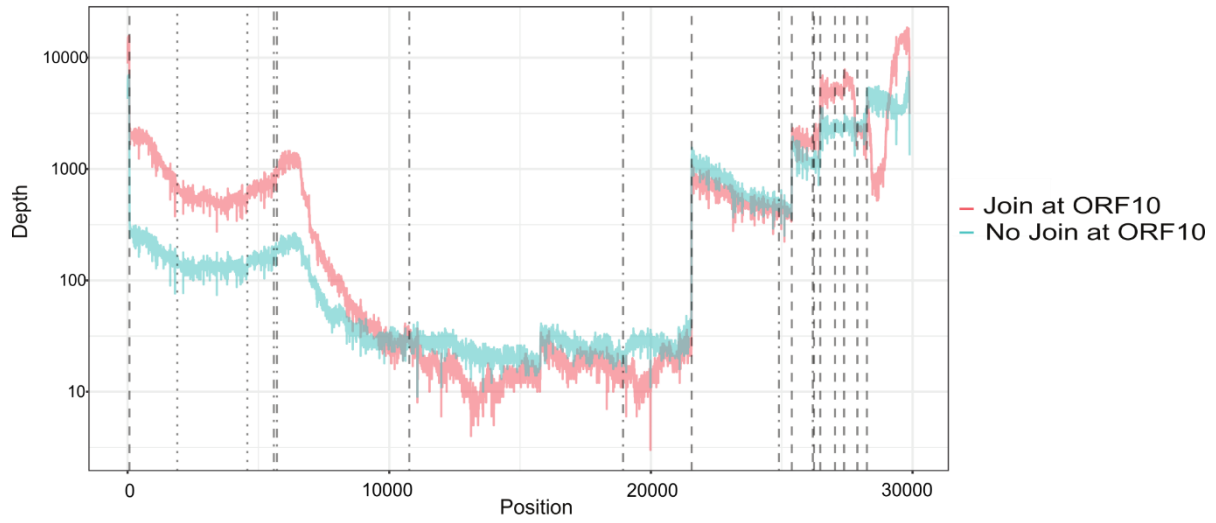**B**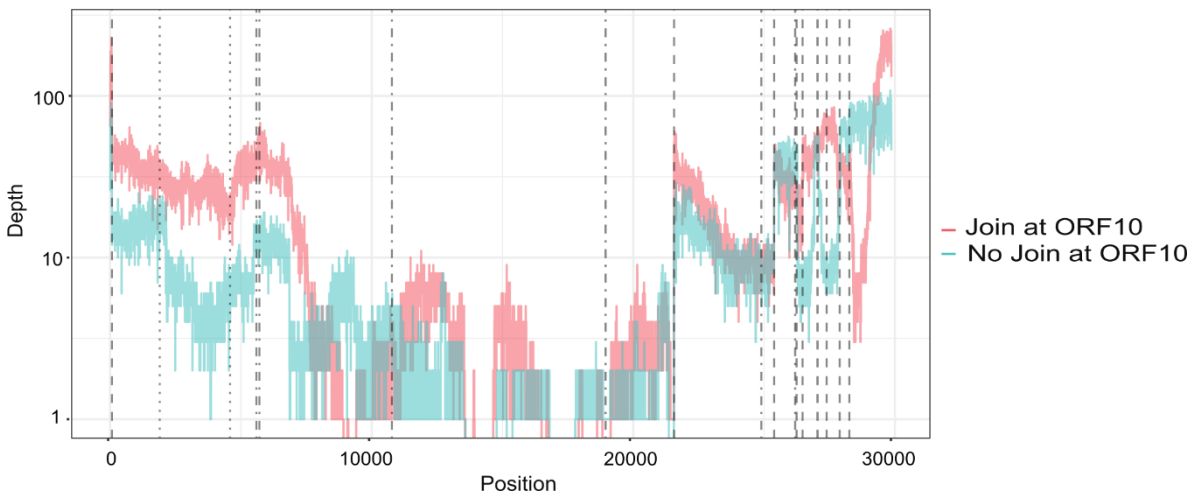

**Figure S4. Multiple junction transcript clusters, Related to Figure 4. A.** Coverage of SARS-CoV-2 double-junction reads which have second breakpoint upstream of ORF10 (i.e. in the N ORF) vs those which do not. **B.** Coverage of SARS-CoV-2 triple junction reads which have second breakpoint upstream of ORF10 vs those which do not.

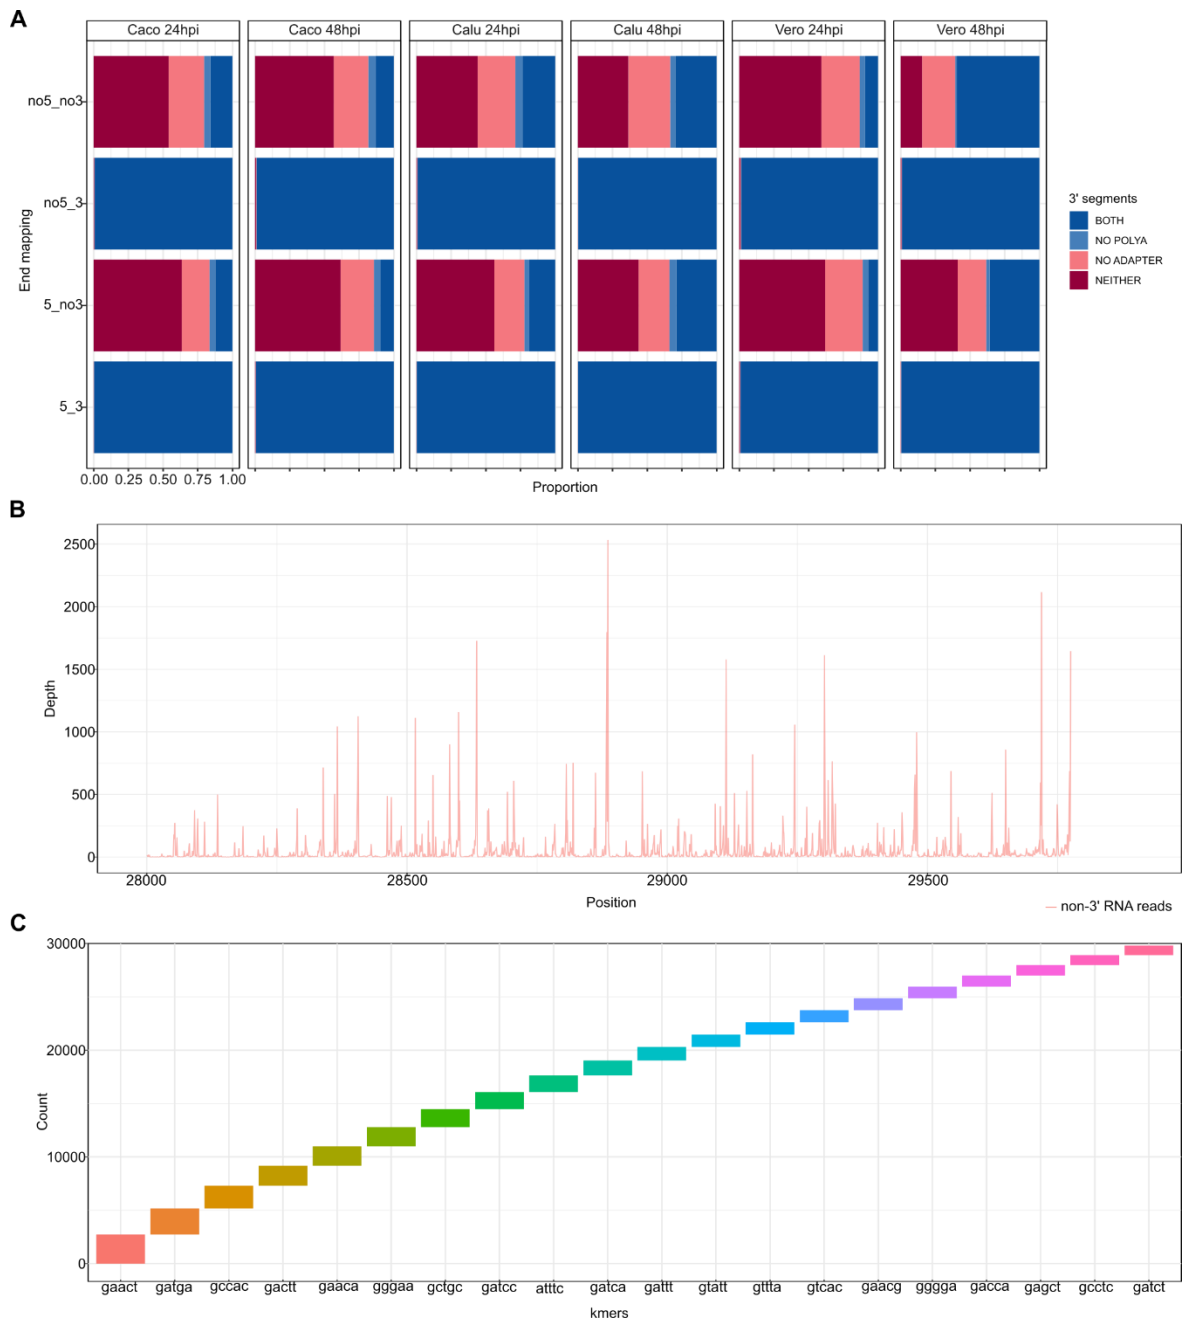

**Figure S5. Characterisation of non-3' mapping reads, Related to Figure 1a & Table S1.** **A.** Poly(A) and sequencing adaptor detection from *Nanopolish* 'polya'. Groups without 3' mapping from all experiments show consistent low detection of poly(A) tail. Vero 48 hpi has a comparatively high amount of poly(A) detection compared to other experiments which remains unexplained. **B.** Genome position at end of read for transcripts without 3' end within final 2000 bases of viral genome. There is non-random distribution of final breaks indicating unexplained bias in the reads that pass through the nanopore for sequencing. **C.** 5-mer at end of non-3' viral RNA reads. 5-mer is centered on final break of the transcript. Although non-random (**5B**), the sequencing of these transcripts cannot be explained by A-rich sequence at their ends.

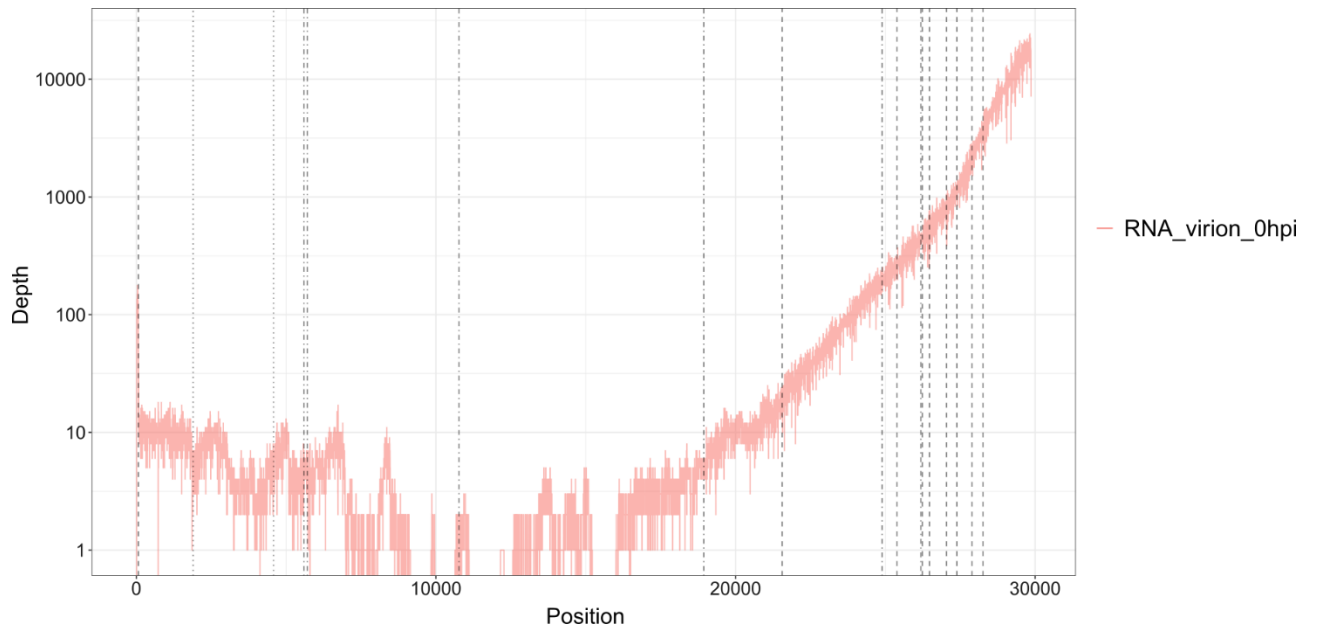

**Figure S6. Coverage of SARS-CoV-2 virion dataset, Related to Figure 6.**

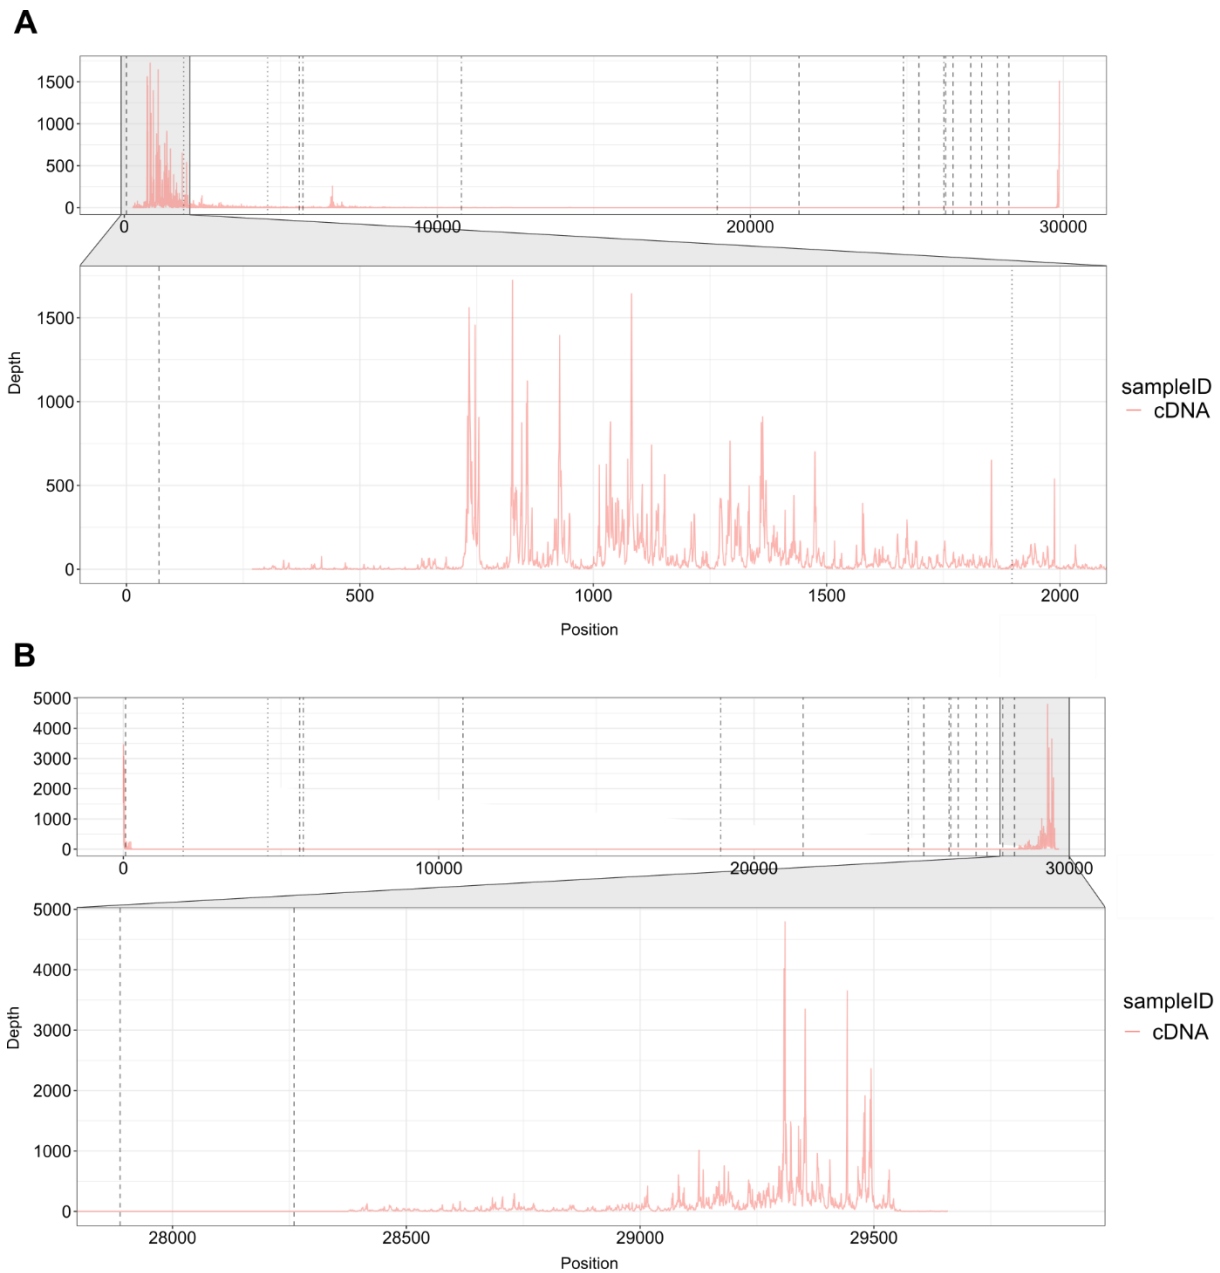

**Figure S7. Histogram of breakpoint positions for leader\_ORF1ab,ORF10\_3UTR transcript cluster, Related to Figure 5. A.** Position at which reads assigned to cluster have a 5' breakpoint or terminate (i.e. contribute to depth “ending”). Zoomed in region shows histogram of 5' break points up to 2 kb. **B.** Position at which reads assigned to cluster have 3' breakpoint or begin (i.e. contribute to depth “starting”). Zoomed in region shows histogram of 3' breakpoints in final 1.5 kb. Dashed vertical lines show position of TRS motif.



**Table S1. Summary table for quantities of non-3' read amongst 24 hpi and 48 hpi timepoints, Related to Figure 1a and Figure S5.**

| <b>Data (dRNA)</b> | <b>Total reads</b> | <b>Total viral</b> | <b>Viral / total</b> | <b>Quant 5_no3 viral</b> | <b>Quant no5_no3 viral</b> | <b>% no3</b> |
|--------------------|--------------------|--------------------|----------------------|--------------------------|----------------------------|--------------|
| Vero 24h           | 3074268            | 2270620            | 0.738588828          | 119002                   | 121254                     | 0.105810748  |
| Vero 48h           | 1477641            | 650135             | 0.439981701          | 5228                     | 19266                      | 0.037675252  |
| Caco 24h           | 1789012            | 76274              | 0.042634706          | 513                      | 858                        | 0.01797467   |
| Caco 48h           | 3140226            | 862715             | 0.274730226          | 9743                     | 14709                      | 0.02834308   |
| Calu 24h           | 2768172            | 105983             | 0.038286277          | 806                      | 1286                       | 0.019739015  |
| Calu 48h           | 1056263            | 84297              | 0.079806828          | 974                      | 2273                       | 0.038518571  |

**Table S2. Table of differentially expressed SARS-CoV-2 subgenomic mRNA between 24 vs 48 hpi timepoints in Vero, Caco-2 and Calu-3 cell lines from direct cDNA data, Related to Figure 5.** The data shows positive linear correlation between significantly differentially expressed transcripts ( $p\text{-adj} < 0.05$ ) from 5\_3 genome-mapped and transcriptome-mapped transcripts (24 vs 48 hpi) via *DESeq2* analysis.

| <b>Transcript (5_3) (Calu-3)</b>     | <b>Log<sub>2</sub>FC (Genome-mapped)</b> | <b>p-adj (Genome-mapped)</b> | <b>Log<sub>2</sub>FC (Transcriptome-mapped)</b> | <b>p-adj (Transcriptome-mapped)</b> |
|--------------------------------------|------------------------------------------|------------------------------|-------------------------------------------------|-------------------------------------|
| leader_leader,M_3UTR                 | -0.499036542                             | 0.000174418                  | -0.339145134                                    | 0.003146436                         |
| leader_ORF1ab,S_ORF1ab,ORF10_3UTR    | 4.589726392                              | 0.000333632                  | 4.689124263                                     | 0.024984433                         |
| leader_leader,N_3UTR                 | -0.487392404                             | 0.000363593                  | -0.301293732                                    | 0.00198282                          |
| leader_leader,S_ORF1ab,ORF10_3UTR    | 2.316968538                              | 0.002390042                  | 4.706383312                                     | 0.024984433                         |
| leader_leader,S_3UTR                 | -0.73058948                              | 0.007852598                  | -0.542396276                                    | 0.046983391                         |
|                                      |                                          |                              |                                                 |                                     |
| <b>Transcript (5_3) (Caco-2)</b>     | <b>Log<sub>2</sub>FC (Genome-mapped)</b> | <b>p-adj (Genome-mapped)</b> | <b>Log<sub>2</sub>FC (Transcriptome-mapped)</b> | <b>p-adj (Transcriptome-mapped)</b> |
| leader_leader,N_3UTR                 | -0.231123208                             | 3.29E-06                     | -0.23543418                                     | 3.6526E-06                          |
| leader_ORF1ab,N_3UTR                 | 0.805493152                              | 0.006221381                  | 1.116735084                                     | 0.00881677                          |
|                                      |                                          |                              |                                                 |                                     |
| <b>Transcript (5_3) (Vero)</b>       | <b>Log<sub>2</sub>FC (Genome-mapped)</b> | <b>p-adj (Genome-mapped)</b> | <b>Log<sub>2</sub>FC (Transcriptome-mapped)</b> | <b>p-adj (Transcriptome-mapped)</b> |
| leader_ORF1ab,ORF10_3UTR             | -0.778074749                             | 3.49E-60                     | -1.646905521                                    | 3.0619E-275                         |
| leader_ORF1ab,N_3UTR                 | -0.799749914                             | 5.86E-32                     | -1.104385193                                    | 3.1755E-37                          |
| leader_leader,S_3UTR                 | -0.490713343                             | 1.76E-13                     | -0.418044275                                    | 1.64256E-13                         |
| leader_leader,ORF3a_3UTR             | -0.259138102                             | 4.00E-07                     | -0.326730165                                    | 6.76954E-17                         |
| leader_3UTR                          | -1.709982359                             | 0.000468107                  | 0.818593098                                     | 8.99277E-06                         |
| leader_leader,M_3UTR                 | -0.173768773                             | 0.001040815                  | -0.356740125                                    | 1.02365E-32                         |
| leader_leader,ORF8_3UTR              | 0.187426966                              | 0.007104081                  | -0.133074185                                    | 0.008634737                         |
| leader_leader,ORF3a_ORF7a,ORF10_3UTR | 0.704433408                              | 0.013883111                  | 1.018348208                                     | 0.036112839                         |
| leader_leader,E_3UTR                 | -0.183780458                             | 0.015175927                  | -0.38179938                                     | 1.41746E-07                         |
